# Supplementary material for: A Confidence Habitats Methodology in MR Quantitative Diffusion for the Classification of Neuroblastic Tumors
Source: Cancers (Basel). 2020 Dec 21;12(12):3858. doi: 10.3390/cancers12123858 (PMC7767170; doi:10.3390/cancers12123858)
Supplement: Supplementary file 1 [file cancers-12-03858-s001.pdf]

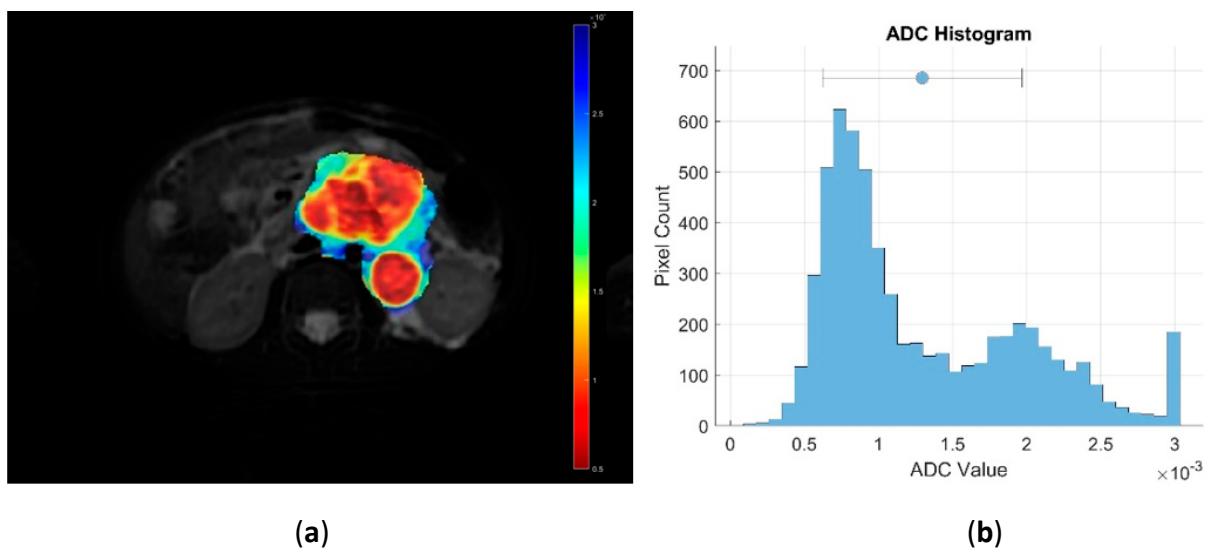

**Figure S1.** (a) Parametric map and (b) distribution histogram of the apparent diffusion coefficient (ADC,  $10^{-3}$  mm<sup>2</sup>/s) obtained with the standard voxel-based mono-exponential signal decay model.

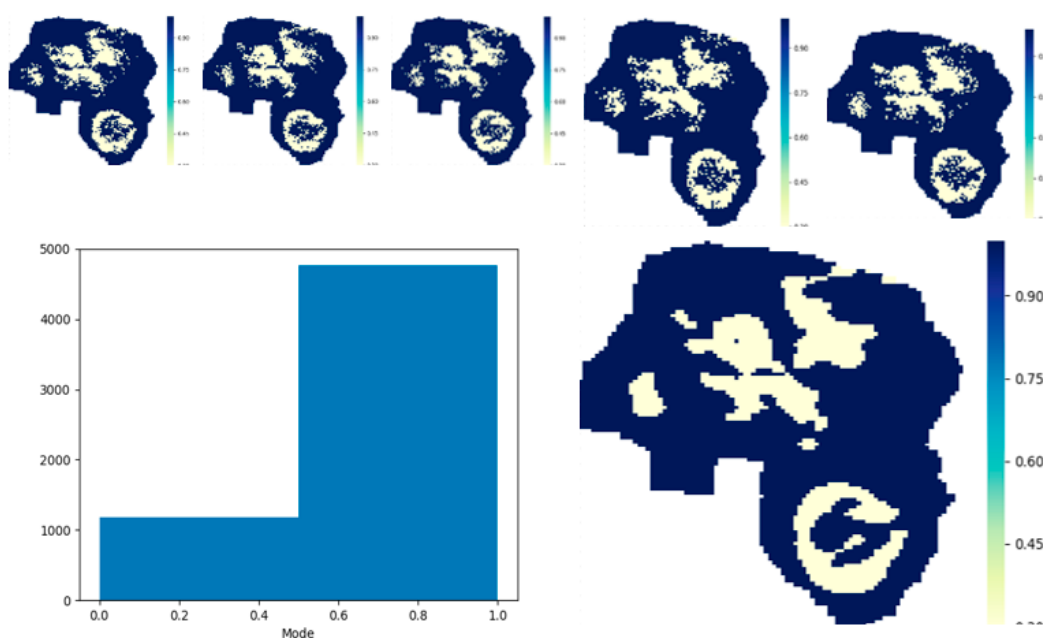

**Figure S2.** Generation of *in-silico* experiments, smearing of ADC values with a double-sided Crystal Ball function and cluster assignment of voxels. At the bottom, frequency map and frequency distribution of voxel allocation.

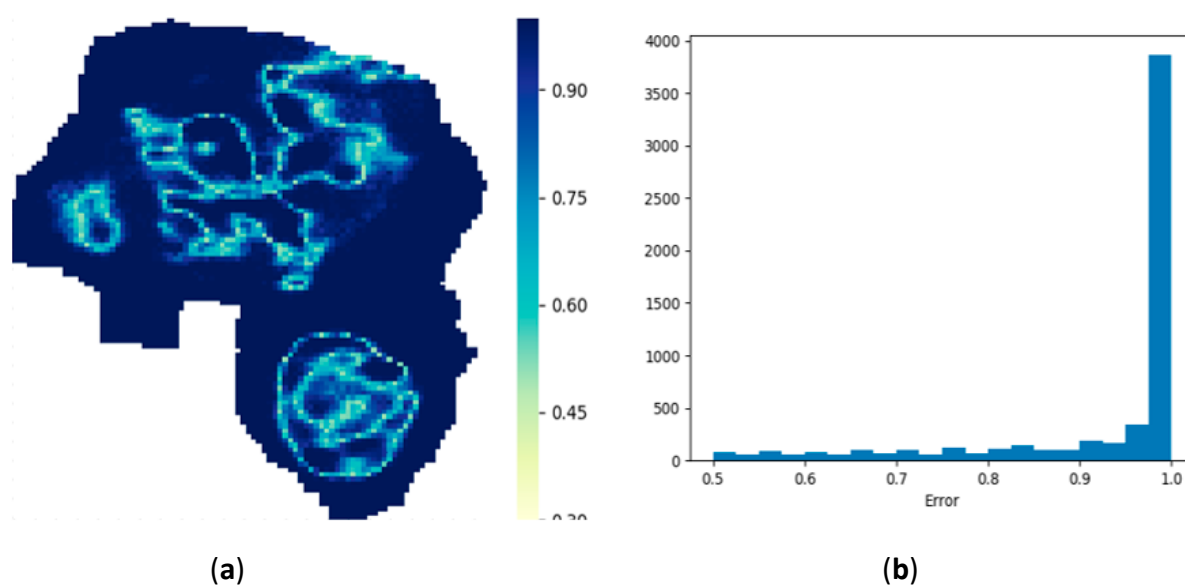

**Figure S3.** (a) Confidence map obtained from in-silico experiments representing the accuracy of voxel allocation to a clustered habitat. (b) The distribution of the confidence level spectrum per voxel can be used to threshold the voxel groups to exclude uncertainties.

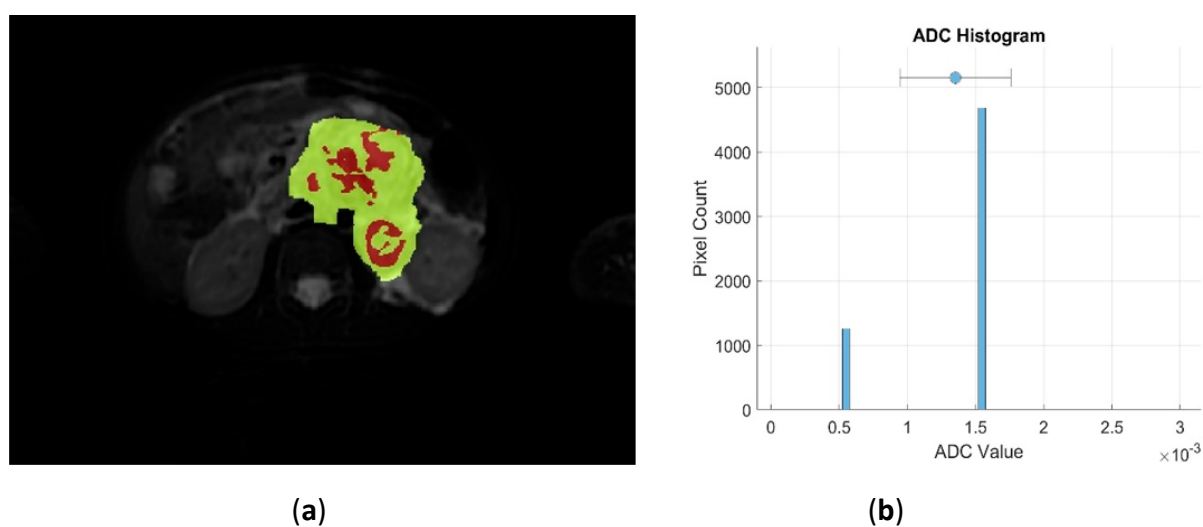

**Figure S4.** (a) Apparent diffusion coefficient (ADC) map ( $10^{-3}$  mm<sup>2</sup>/s) obtained with the *Fit-Cluster-Fit* method. (b) Distribution of the ADC spectrum performing a voxel-wise clustering into two habitats, with the 5<sup>th</sup> percentile as the parcellation threshold.

**Table S1.** Apparent diffusion coefficient (ADC) values per tumor malignancy in voxel-based, cluster-based and *Fit-Cluster-Fit* models with different confidence thresholds to exclude uncertainties (60%, 70%, 80%, 90% and 95%). Clustered habitats were built based on the 10<sup>th</sup> percentile of the artificially generated ADC distributions.

| Method        | ADC cut-off value | ADC value (10 <sup>-3</sup> mm <sup>2</sup> /s) |           | Sensitivity (%) | Specificity (%) | Accuracy (%) | PPV (%) | NPV (%) | AUC   |
|---------------|-------------------|-------------------------------------------------|-----------|-----------------|-----------------|--------------|---------|---------|-------|
|               |                   | Benign                                          | Malignant |                 |                 |              |         |         |       |
| Voxel-based   | 1.56              | 1.89±0.55                                       | 1.23±0.34 | 87              | 78              | 84           | 91      | 70      | 0.877 |
| Cluster-based | 0.80              | 1.33±0.41                                       | 0.60±0.24 | 87              | 100             | 91           | 100     | 75      | 0.966 |
| FCF           | 0.81              | 1.36±0.42                                       | 0.63±0.24 | 87              | 100             | 91           | 100     | 75      | 0.959 |
| FCF (60%)     | 0.76              | 1.33±0.41                                       | 0.61±0.24 | 83              | 100             | 88           | 100     | 69      | 0.959 |
| FCF (70%)     | 0.76              | 1.27±0.40                                       | 0.58±0.24 | 87              | 100             | 91           | 100     | 75      | 0.961 |
| FCF (80%)     | 0.71              | 1.18±0.36                                       | 0.54±0.21 | 87              | 100             | 91           | 100     | 75      | 0.966 |
| FCF (90%)     | 0.69              | 1.11±0.35                                       | 0.51±0.20 | 87              | 100             | 91           | 100     | 75      | 0.969 |
| FCF (95%)     | 0.68              | 1.06±0.35                                       | 0.49±0.19 | 87              | 100             | 91           | 100     | 75      | 0.966 |

**Table S2.** Apparent diffusion coefficient (ADC) values per tumor malignancy in voxel-based, cluster-based and *Fit-Cluster-Fit* models with different confidence thresholds to exclude uncertainties (60%, 70%, 80%, 90% and 95%). Clustered habitats were built based on the 15<sup>th</sup> percentile of the artificially generated ADC distributions.

| Method        | ADC cut-off value | ADC value (10 <sup>-3</sup> mm <sup>2</sup> /s) |           | Sensitivity (%) | Specificity (%) | Accuracy (%) | PPV (%) | NPV (%) | AUC   |
|---------------|-------------------|-------------------------------------------------|-----------|-----------------|-----------------|--------------|---------|---------|-------|
|               |                   | Benign                                          | Malignant |                 |                 |              |         |         |       |
| Voxel-based   | 1.56              | 1.89±0.55                                       | 1.23±0.34 | 87              | 78              | 84           | 91      | 70      | 0.877 |
| Cluster-based | 0.83              | 1.12±0.52                                       | 0.60±0.24 | 87              | 100             | 91           | 100     | 75      | 0.966 |
| FCF           | 0.83              | 1.13±0.57                                       | 0.63±0.24 | 87              | 100             | 91           | 100     | 75      | 0.957 |
| FCF (60%)     | 0.82              | 1.10±0.57                                       | 0.61±0.24 | 87              | 100             | 91           | 100     | 75      | 0.957 |
| FCF (70%)     | 0.77              | 1.05±0.55                                       | 0.58±0.24 | 87              | 100             | 91           | 100     | 75      | 0.957 |
| FCF (80%)     | 0.75              | 0.96±0.49                                       | 0.54±0.21 | 87              | 100             | 91           | 100     | 75      | 0.966 |
| FCF (90%)     | 0.72              | 0.91±0.47                                       | 0.51±0.20 | 87              | 100             | 91           | 100     | 75      | 0.969 |
| FCF (95%)     | 0.70              | 0.87±0.45                                       | 0.49±0.19 | 87              | 100             | 91           | 100     | 75      | 0.971 |
